# Supplementary material for: Molecular dynamics simulation and non-isothermal crystallization kinetics of polyamide 4 and different bio-based polyamide blends
Source: Royal Society of Chemistry journal article supplement (doi:10.1039/d3cp02528d), 2023-01-01
Supplement: d3cp02528d1.pdf [file d3cp02528d1.pdf]

## Supplementary Information

# Molecular dynamics simulation and non-isothermal crystallization kinetics of polyamide 4 and different bio-based polyamide blends

Yajing Zhang,<sup>ab</sup> Mingda Wang,<sup>ab</sup> Liquan Wang,<sup>d</sup> Tao Chen<sup>bd</sup>, Weisheng Feng,<sup>d</sup> Tianyi Wang<sup>d</sup> and Liming Zhao<sup>\*abc</sup>

<sup>a</sup> State Key Laboratory of Bioreactor Engineering, East China University of Science and Technology, Shanghai 200237, China. E-mail: zhaoliming@ecust.edu.cn.

<sup>b</sup> Key Laboratory of Biobased Material Engineering, China National Light Industry, East China University of Science and Technology, Shanghai 200237, China.

<sup>c</sup> Shanghai Collaborative Innovation Center for Biomanufacturing Technology (SCICBT), Shanghai 200237, China.

<sup>d</sup> Shanghai Key Laboratory of Advanced Polymeric Materials, School of Materials Science and Engineering, East China University of Science and Technology, Shanghai 200237, China.

## Methods

The simulations were conducted using LJ units, and all quantities are unitless. The units of mass, length, time, and energy are defined by  $m$ ,  $r_c$ ,  $\tau$ , and  $k_B T$ , respectively. The time unit  $\tau$  can be formulated by<sup>S1</sup>

$$\tau = \sqrt{m r_c^2 / k_B T} \quad (\text{S1})$$

where  $T$  and  $k_B$  are the absolute temperature and Boltzmann constant, respectively.  $k_B T$  and  $m$  are equal to 1.0 in our simulations. This simulation only considers the nonbonding potential energy ( $U_{nb}$ ), bond potential energy ( $U_b$ ), bond-angle-bending potential energy ( $U_A$ ), and hydrogen-bond interaction potential energy ( $U_{hb}$ ). The parameters of the beads, nonbonding potential energy, bonds, and angles are shown in Table S1-S4.

Table S1 Parameters for beads.

| Bead type | Description                                   | $m$ | $\varepsilon$ | $\sigma$ |
|-----------|-----------------------------------------------|-----|---------------|----------|
| A         | N atom in the amide group                     | 1.0 | 1.0           | 1.0      |
| B         | Carbonyl group in the amide group             | 1.0 | 1.0           | 1.0      |
| C         | Methylene group in the molecular chain of PA4 | 1.0 | 1.0           | 1.0      |
| D         | Methylene group in the molecular chain of PAX | 1.0 | 1.0           | 1.0      |
| H         | H atoms attached to the N atoms               | 1.0 | 1.0           | 1.0      |

Table S2 Parameters for nonbonding potential energy.

| Bead 1 | Bead 2 | $\Delta$ | $\varepsilon$ | $\sigma$ | $r_{nb}$  |
|--------|--------|----------|---------------|----------|-----------|
| A      | A      | 0        | 1.0           | 1.0      | $4.5 r_c$ |
| A      | B      | 0        | 1.0           | 1.0      | $4.5 r_c$ |
| A      | C      | 0        | 1.0           | 1.0      | $4.5 r_c$ |
| A      | D      | 0        | 1.0           | 1.0      | $4.5 r_c$ |
| A      | H      | -0.8     | 1.0           | 1.0      | $4.5 r_c$ |
| B      | B      | 0        | 1.0           | 1.0      | $4.5 r_c$ |
| B      | C      | 0        | 1.0           | 1.0      | $4.5 r_c$ |
| B      | D      | 0        | 1.0           | 1.0      | $4.5 r_c$ |
| B      | H      | -0.8     | 1.0           | 1.0      | $4.5 r_c$ |
| C      | C      | 0        | 1.0           | 1.0      | $4.5 r_c$ |
| C      | D      | 0        | 1.0           | 1.0      | $4.5 r_c$ |
| C      | H      | -0.8     | 1.0           | 1.0      | $4.5 r_c$ |
| D      | D      | 0        | 1.0           | 1.0      | $4.5 r_c$ |
| D      | H      | -0.8     | 1.0           | 1.0      | $4.5 r_c$ |
| H      | H      | -1.6     | 1.0           | 1.0      | $4.5 r_c$ |

Table S3 Parameters for bonds.

| Bead 1 | Bead 2 | $K_b$                    | $R_b$       |
|--------|--------|--------------------------|-------------|
| A      | B      | $30\varepsilon/\sigma^2$ | $1.5\sigma$ |
| A      | H      | $30\varepsilon/\sigma^2$ | $1.5\sigma$ |
| B      | C      | $30\varepsilon/\sigma^2$ | $1.5\sigma$ |
| B      | D      | $30\varepsilon/\sigma^2$ | $1.5\sigma$ |

Table S4 Parameters for angles.

| Bead 1 | Bead 2 | Bead 3 | $\theta_0$ | $K_A$ |
|--------|--------|--------|------------|-------|
| A      | B      | C      | 180        | 10.0  |
| A      | B      | D      | 180        | 10.0  |
| B      | C      | C      | 180        | 10.0  |
| B      | D      | D      | 180        | 10.0  |
| C      | A      | B      | 180        | 10.0  |
| D      | A      | B      | 180        | 10.0  |
